# Supplementary material for: Anti-Inflammatory Activity of Pequi Oil (Caryocar brasiliense): A Systematic Review
Source: MDPI journal article supplement (doi:10.3390/ph17010011), 2023-12-21
Supplement: s1 [file s1]

| Data base           | String                                                                                                                                                                                                                                      | Results | Search date |
|---------------------|---------------------------------------------------------------------------------------------------------------------------------------------------------------------------------------------------------------------------------------------|---------|-------------|
| BSV regional portal | ((("Caryocar brasiliense" OR Pequi) AND (oil OR "plant oil*" OR "fatty acid" OR "vegetable oil") AND (inflammation* OR "anti-inflammatory")))                                                                                               | 25      | 31.10.2022  |
| CINAHL              | (Pequi OR "Caryocar brasiliense" OR Caryocar) AND (Oil* OR fatty acid OR "vegetable oil" OR "plant oil") AND (inflammation OR inflammatory OR "inflammatory marker" OR "antiinflammatory")                                                  | 21      | 31.10.2022  |
| Cochrane            | (Pequi OR "Caryocar brasiliense" OR Caryocar) AND (Oil* OR fatty acid OR "vegetable oil" OR "plant oil") AND (inflammation OR inflammatory OR "inflammatory marker" OR "antiinflammatory")                                                  | 6       | 31.10.2022  |
| LILACS              | ((("Caryocar brasiliense" OR Pequi) AND (oil OR "plant oil*" OR "fatty acid" OR "vegetable oil") AND (inflammation* OR "anti-inflammatory")))                                                                                               | 3       | 31.10.2022  |
| Embase              | ('pequi oil'/exp OR pequi OR 'caryocar brasiliense'/exp) AND ('oil'/exp OR 'vegetable oil'/exp OR 'fatty acid'/exp) AND ('inflammation'/exp OR 'antiinflammatory agent'/exp OR 'inflammatory marker'/exp OR 'immune system'/exp)            | 31      | 31.10.2022  |
| FSTA                | (Pequi OR "Caryocar brasiliense" OR Caryocar) AND (Oil* OR fatty acid OR "vegetable oil" OR "plant oil") AND (inflammation OR inflammatory OR "inflammatory marker" OR "antiinflammatory")                                                  | 12      | 31.10.2022  |
| MEDLINE             | ((("Caryocar brasiliense" OR Pequi) AND (oil OR "plant oil*" OR "fatty acid" OR "vegetable oil") AND (inflammation* OR "anti-inflammatory")))                                                                                               | 22      | 31.10.2022  |
| ProQuest            | ((SU.X(Pequi)) OR "Caryocar brasiliense" OR "Pequi oil") AND (oil OR "vegetable oil" OR "fatty acid" OR "plant oil") AND (inflammation OR "inflammatory markers" OR "anti-inflammatory")<br>Refine filter "academic journals" were applied. | 142     | 31.10.2022  |
| PubMed              | (Pequi OR "Caryocar brasiliense") AND ( "Plant Oils"[Mesh] AND ("Inflammation"[Mesh] OR "Inflammation Mediators"[Mesh] OR "Anti-Inflammatory Agents"[Mesh]))                                                                                | 5       | 31.10.2022  |
| ScienceDirect       | (Pequi OR 'Caryocar brasiliense' OR 'pequi oil') AND (oil OR 'plant oil') AND (inflammation OR 'inflammatory markers' OR 'anti-inflammatory')<br>Refine filter "research articles" were applied.                                            | 64      | 31.10.2022  |
| Scopus              | ( TITLE-ABS-KEY-AUTH ( pequi OR "caryocar brasiliense" OR "Pequi oil" ) ) AND (ALL(inflammation* OR "inflammatory response" OR "anti-inflammatory" ) AND ( oil OR "plant oil" ))                                                            | 84      | 31.10.2022  |
| Web of Science      | ALL=((Pequi OR "Caryocar brasiliense" OR "pequi oil") AND oil* AND (inflammation* OR "inflammatory markers*" OR "anti-inflammatory"))                                                                                                       | 22      | 31.10.2022  |
