# Supplementary material for: Anti-Inflammatory Activity of Pequi Oil (Caryocar brasiliense): A Systematic Review
Source: MDPI journal article supplement (doi:10.3390/ph17010011), 2023-12-21
Supplement: s1 [file s1]

### Quality analysis questions

|    |                                                                                                                                                                                                  |
|----|--------------------------------------------------------------------------------------------------------------------------------------------------------------------------------------------------|
| 1  | Are the experimental groups comparable and are control groups present?                                                                                                                           |
| 2  | Is the number of experimental units in each group clearly reported? And is it the same number (n) evaluated in statistical analyses?                                                             |
| 3  | Were pre-established criteria described for inclusion or exclusion of experimental units during the experiments or during the analyses?                                                          |
| 4  | Applicable for in vivo and clinical studies only.<br>Is there a description of any method of randomization of experimental units into treatment groups?                                          |
| 5  | Applicable for in vivo and clinical studies only.<br>Is there a description of the application of some method of blinding the researchers, mainly those responsible the analysts of the results? |
| 6  | Were the biological variables considered for measuring the outcomes (conclusions) clearly described?                                                                                             |
| 7  | Have the details of the statistical analysis used in each analysis been reported?                                                                                                                |
| 8  | Has all relevant information about the characteristics of experimental units been clearly described?                                                                                             |
| 9  | Are the steps of the experimental procedures and their intervals and measurements described clearly and with a level of detail that allows for replication?                                      |
| 10 | Do the results contain data from all experiments clearly described with an indication of the statistically significant difference value (p value)?                                               |
| 11 | Is the study abstract clear and does it contain all relevant information? As objectives, experimental design, key methods used and relevant results?                                             |
| 12 | Does the introduction bring information that contextualizes and justifies the study?                                                                                                             |
| 13 | Is the research question clearly stated in the study objectives?                                                                                                                                 |
| 14 | Is there a description of approval of the use of cells (primary culture), animals or humans by an ethics committee and was the name of the committee reported?                                   |
| 15 | Applicable for in vivo and clinical studies only.<br>Were the experimental conditions of experimental units allocation and supplementation clearly reported?                                     |
| 16 | Applicable for in vivo and clinical studies only.<br>Were procedures performed to reduce stress, pain and suffering of the experimental units described?                                         |
| 17 | Is the interpretation of the results contextualized with the objectives of the study? And were the limitations of the study described?                                                           |
| 18 | Is there a description of the results that indicates the possibility or not of translation for future experiments in other experimental models?                                                  |
| 19 | Is there information about a study protocol that was developed before the start of the experiments? If so, is there an indication of where it was published?                                     |
| 20 | Did the study provide raw data regarding the results?                                                                                                                                            |
| 21 | Is there a declaration of the presence or absence of conflicts of interest in the study?                                                                                                         |
