# Supplementary material for: Anti-Inflammatory Activity of Pequi Oil (Caryocar brasiliense): A Systematic Review
Source: MDPI journal article supplement (doi:10.3390/ph17010011), 2023-12-21
Supplement: s1 [file s1]

### Criteria of exclusion table

| Author/ year                  | Criteria of exclusion |
|-------------------------------|-----------------------|
| Bezerra et al., 2020          | 3                     |
| Clael et al., 2020            | 3                     |
| Miranda-Vilela et al., 2014   | 3                     |
| Nascimento-Silva et al., 2019 | 4                     |
| Pires et al., 2020            | 3                     |
| Ribeiro et al., 2013          | 3                     |
| Vale et al., 2019             | 3                     |
| Rabbers et al., 2019          | 3                     |
| Gusman et al., 2015           | 2                     |
| Torres et al., 2020           | 3                     |
| Silva et al., 2022            | 1                     |

### Criteria of exclusion:

- 1- Pequi oil from different species than *Caryocar brasiliense*.
- 2- Pequi extract, fractionated pequi oil or other isolated compounds of *Caryocar brasiliense*.
- 3- Anti-inflammatory activity not evaluated in an *in vitro*, *in vivo* or clinical test model.
- 4- Review articles, book chapters, theses, letters, personal opinions, conference abstracts, and patents.
